# Supplementary material for: The Relationship between Carcass Condemnations and Tail Lesion in Swine Considering Different Production Systems and Tail Lengths
Source: MDPI journal article supplement (doi:10.3390/ani12080949), 2022-04-07
Supplement: s1 [file s1]

## Supplementary materials

**Table S1.** Requirements descriptions of the three different pig production systems.

| Requirements                                          | Production system                                                                       |                                                                                                                  |                                                                                      |
|-------------------------------------------------------|-----------------------------------------------------------------------------------------|------------------------------------------------------------------------------------------------------------------|--------------------------------------------------------------------------------------|
|                                                       | Conventional[26]                                                                        | Conventional AB <sup>1</sup> [26]*                                                                               | Organic [27],[28]                                                                    |
| Born outdoor/indoor                                   | indoor                                                                                  |                                                                                                                  |                                                                                      |
| Age at weaning                                        | 21-25 days                                                                              |                                                                                                                  | approximately 40 days                                                                |
| Tail docking                                          | allowed, but as last resource measure                                                   |                                                                                                                  | prohibited except under specific exceptions**                                        |
| Teeth reduction                                       | grinding or partially cut only if necessary, within the first 3 days                    |                                                                                                                  |                                                                                      |
| Resting area with bedding                             | required                                                                                |                                                                                                                  |                                                                                      |
| Floors                                                | slat/solid floor                                                                        |                                                                                                                  | slat/solid floor - at least 50% of the required minimum area should have solid floor |
| Access to an outdoor facility                         | optional                                                                                |                                                                                                                  | required                                                                             |
| Batch mixing                                          | allowed                                                                                 | not allowed                                                                                                      |                                                                                      |
| Area required per pig                                 | 0.65 m²/head                                                                            |                                                                                                                  | indoor area - 1,1m²/head;<br>outdoor area – 1m²/head                                 |
| Access to roughage                                    | optional                                                                                |                                                                                                                  | required                                                                             |
| Treatment with antibiotics                            | allowed                                                                                 | prohibited from 65 days of life                                                                                  | prohibited***                                                                        |
| Withdrawal time related to veterinary administrations | if the medication does not indicate the withdrawal time, it has got be at least 28 days | twice as long as the legislation indicates (if the time indicated by the medication is too short - at least 48h) |                                                                                      |

<sup>1</sup> Antibiotic-free

\* Conventional antibiotic-free is a commercial category established by the producing company

\*\*Although most of the organically raised animals in this study presented docked tails, this is stated in the European regulation.

\*\*\*Declassified as organic pig if: 3 or more treatments with antibiotics, within 12 months OR 1 or more treatment if its productive life cycle is less than one year.

- [26] Ministerio de Agricultura Pesca y Alimentación. Royal Decree 1135/2002 of October 31, Relative to the Minimum Standards for the Protection of Pigs. *Boletín Oficial Del Estado* **2002**, 1–8.
- [27] The Council of the European Union. Council Regulation (EC) No 834/2007 of 28 June 2007 on Organic Production and Labelling of Organic Products and Repealing Regulation (EEC) No 2092/91. *Official Journal of the European Union* **2007**, L 189, 1–23.
- [28] The Commission of the European Communities. Commission Regulation (EC) No 889/2008 of 5 September 2008 Laying down Detailed Rules for the Implementation of Council Regulation (EC) No 834/2007 on Organic Production and Labelling of Organic Products with Regard to Organic Production, Labelling and Control. *Official Journal of the European Union* **2008**, L 250, 1–84.

**Table S2.** Values (mean  $\pm$  Standard Error and range) of batch-level ( $n = 73$ ) tail lesions and scarring scores by production system and tail-docking practices in pigs' batches examined at the slaughterhouse.

|                              | N  | Batch tail lesion score |                      | Batch tail scarring score |                      |
|------------------------------|----|-------------------------|----------------------|---------------------------|----------------------|
|                              |    | Mean $\pm$ SE           | Range<br>(min – max) | Mean $\pm$ SE             | Range<br>(min – max) |
| All batches                  | 73 | 0.85 $\pm$ 0.03         | 0.26 – 1.74          | 0.17 $\pm$ 0.02           | 0 – 0.66             |
| <b>Production System</b>     |    |                         |                      |                           |                      |
| Conventional                 | 51 | 0.87 $\pm$ 0.04         | 0.37 – 1.74          | 0.18 $\pm$ 0.02           | 0 – 0.66             |
| Conventional AB <sup>1</sup> | 12 | 0.82 $\pm$ 0.06         | 0.55 – 1.22          | 0.14 $\pm$ 0.03           | 0 – 0.34             |
| Organic                      | 10 | 0.75 $\pm$ 0.10         | 0.26 – 1.12          | 0.13 $\pm$ 0.03           | 0 – 0.31             |
| <b>Tail-docking</b>          |    |                         |                      |                           |                      |
| Fully docked                 | 57 | 0.80 $\pm$ 0.03         | 0.26 – 1.39          | 0.16 $\pm$ 0.02           | 0 – 0.66             |
| Docked at mid-length         | 7  | 0.88 $\pm$ 0.07         | 0.64 – 1.12          | 0.16 $\pm$ 0.03           | 0.06 – 0.31          |
| Undocked                     | 9  | 1.10 $\pm$ 0.10         | 0.76 – 1.74          | 0.19 $\pm$ 0.04           | 0.04 – 0.42          |

<sup>1</sup> Antibiotic-free**Table S3.** Logistic regression model exploring batch-level variation in the occurrence of total condemnations due to pyaemia in pigs' batches ( $n = 73$ ) at the slaughterhouse. For significant variables, odds ratio estimates (OR) and their 95% confidence interval (CI) are presented, with estimates for continuous scores calculated for a 0.5 unit increase. Significant p-values and ORs are highlighted in bold.

| Response variable              | Explanatory variable    | Statistic        | p-Value       | Odds Ratio  |                    |
|--------------------------------|-------------------------|------------------|---------------|-------------|--------------------|
|                                |                         |                  |               | Estimate    | 95%CI              |
| TC <sup>1</sup> due to pyaemia | Batch tail lesion score | $\chi^2_1=6.22$  | <b>0.0126</b> | <b>2.06</b> | <b>1.16 – 3.63</b> |
|                                | Batch scarring score    | $\chi^2_1=13.79$ | <b>0.0002</b> | <b>3.86</b> | <b>1.89 – 7.88</b> |
|                                | Production system       | $\chi^2_2=2.30$  | 0.32          |             |                    |
|                                | Tail length             | $\chi^2_2=0.45$  | 0.80          |             |                    |

<sup>1</sup> Total condemnations

**Table S4.** Logistic regression model exploring batch-level variation in local condemnation due to abscesses probability within pigs' batches ( $n = 73$ ) at the slaughterhouse. For significant variables, odds ratio estimates (OR) and their 95% confidence interval (CI) are presented, with estimates for continuous scores calculated for a 0.5 unit increase. Significant p-values and ORs are highlighted in bold.

| Response variable              | Explanatory variable    | Statistic        | p-Value           | Odds Ratio                           |                    |                    |
|--------------------------------|-------------------------|------------------|-------------------|--------------------------------------|--------------------|--------------------|
|                                |                         |                  |                   | Estimate                             | 95%CI              |                    |
| LC <sup>1</sup> due to abscess | Batch tail lesion score | $\chi^2_1=0.50$  | 0.48              |                                      |                    |                    |
|                                | Batch scarring score    | $\chi^2_1=44.69$ | <b>&lt;0.0001</b> | <b>3.65</b>                          | <b>2.50 – 5.34</b> |                    |
|                                | Production system       | $\chi^2_2=2.01$  | 0.37              |                                      |                    |                    |
|                                | Tail length             | $\chi^2_2=17.24$ | <b>0.0002</b>     | Undocked vs Fully docked             | <b>1.70</b>        | <b>1.13 – 2.57</b> |
|                                |                         |                  |                   | Undocked vs Docked at mid-length     | 0.81               | 0.49 – 1.33        |
|                                |                         |                  |                   | Docked at mid-length vs Fully docked | <b>2.10</b>        | <b>1.43 – 3.10</b> |
|                                |                         |                  |                   |                                      |                    |                    |

<sup>1</sup> Local condemnations
